# Supplementary material for: Identification of Host Proteins Interacting with IBV S1 Based on Tracheal Organ Culture
Source: MDPI journal article supplement (doi:10.3390/v15051216), 2023-05-22
Supplement: s1 [file s1]

Supplementary Table S1 Candidate host proteins interacting with IBV S1

| No. | Name of the proteins                                     | Gene names   |
|-----|----------------------------------------------------------|--------------|
| 1   | catenin beta-1                                           | CTNNB1       |
| 2   | microtubule-associated serine/threonine-protein kinase 4 | MAST4        |
| 3   | F-box/LRR-repeat protein 2                               | FBXL2        |
| 4   | zinc finger protein 302                                  | ZNF302       |
| 5   | nucleolar protein 8                                      | NOL8         |
| 6   | anchorin CII                                             | /            |
| 7   | annexin A5                                               | ANXA5        |
| 8   | vacuolar H <sup>+</sup> -ATPase B                        | ATP6V1B2     |
| 9   | Rho-associated coiled-coil forming kinase 1              | Rock1        |
| 10  | HSP 70                                                   | HSP70        |
| 11  | MTGR1                                                    | MTGR1        |
| 12  | CBFA2T2                                                  | CBFA2T2      |
| 13  | Iron responsive element binding protein                  | IREB2        |
| 14  | cytoplasmic aconitate hydratase                          | /            |
| 15  | Hyperion protein                                         | /            |
| 16  | DEC-205 protein precursor                                | /            |
| 17  | lymphocyte antigen 75 precursor                          | /            |
| 18  | probable ATP-dependent RNA helicase DDX52                | DDX52        |
| 19  | oral-facial-digital syndrome 1                           | OFD1         |
| 20  | potassium channel subfamily K member 5                   | KCNK5        |
| 21  | HID1                                                     | HID1         |
| 22  | integrin beta-4                                          | ITGB4        |
| 23  | cleavage stimulation factor subunit 3                    | CSTF3        |
| 24  | flotillin-2                                              | FLOT2        |
| 25  | hematopoietic lineage cell-specific protein              | LOC107055808 |
| 26  | synaptotagmin-like protein 1                             | SYTL1        |
| 27  | probable proline--tRNA ligase, mitochondrial precursor   | PARS2        |
| 28  | sodium voltage-gated channel alpha subunit 11            | SCN11A       |
| 29  | rab5 GDP/GTP exchange factor                             | RABGEF1      |
| 30  | histone acetyltransferase type B catalytic subunit       | HAT1         |
| 31  | centromere protein F                                     | CENPF        |
| 32  | hemoglobin subunit alpha-A                               | HBA1         |
| 33  | alpha-globin                                             | HBA          |
| 34  | Thyroid hormone receptor alpha                           | THRA         |
| 35  | protein c-erbA                                           | CERBA        |
| 36  | Nuclear factor NF-kappa-B p100 subunit;                  | NFKB2        |
| 37  | UAP56-interacting factor                                 | /            |
| 38  | rho GTPase-activating protein 26                         | ARHGAP26     |
| 39  | ubiquitin-conjugating enzyme E2 T                        | UBE2T        |
| 40  | chondroitin sulfate proteoglycan 4                       | CSPG4        |
| 41  | cocaine- and amphetamine-regulated transcript protein    | CART         |
| 42  | WW domain-binding protein 11                             | WBP11        |

|    |                                                                   |              |
|----|-------------------------------------------------------------------|--------------|
| 43 | nectin-3                                                          | NECTIN3      |
| 44 | cAMP-regulated phosphoprotein 21                                  | ARPP21       |
| 45 | unconventional myosin-Ie                                          | MYO1E        |
| 46 | nuclear factor interleukin-3-regulated protein                    | NFIL3        |
| 47 | aminopeptidase O                                                  | AOPEP        |
| 48 | bromodomain-containing protein 4                                  | BRD4         |
| 49 | metastasis-associated protein MTA2                                | MTA2         |
| 50 | metallo-beta-lactamase domain-containing protein 1                | MBLAC1       |
| 51 | cystic fibrosis transmembrane conductance regulator               | CFTR         |
| 52 | synaptonemal complex protein 2-like                               | SYCP2L       |
| 53 | PDZ and LIM domain protein 5                                      | PDLIM5       |
| 54 | FAM13A                                                            | FAM13A       |
| 55 | TNF-related apoptosis inducing ligand-like protein                | TRAIL-LIKE   |
| 56 | acetyl-coenzyme A synthetase 2-like, mitochondrial                | /            |
| 57 | SLIT and NTRK-like protein 4                                      | SLITRK4      |
| 58 | probable E3 ubiquitin-protein ligase HERC1                        | LOC107056784 |
| 59 | solute carrier family 2, facilitated glucose transporter member 8 | SLC2A8       |
| 60 | glucose transporter type 8                                        | /            |
| 61 | putative Polycomb group protein ASXL3                             | ASXL3        |
| 62 | eyes absent homolog 1                                             | EYA1         |
| 63 | echinoderm microtubule-associated protein-like 6                  | EML6         |
| 64 | bcl-2-associated transcription factor 1                           | BCLAF1       |
| 65 | DNA helicase MCM9                                                 | MCM9         |
| 66 | FAM184A                                                           | FAM184A      |
| 67 | sn1-specific diacylglycerol lipase alpha                          | DAGLA        |
| 68 | growth arrest-specific protein 2                                  | GAS2         |
| 69 | otogelin                                                          | OTOG         |
| 70 | zinc finger and BTB domain-containing protein 42                  | ZBTB42       |
| 71 | FRA10AC1                                                          | FRA10AC1     |
| 72 | partitioning defective 3 homolog B                                | PARD3B       |
| 73 | histone H2A deubiquitinase MYSM1                                  | MYSM1        |
| 74 | scm-like with four MBT domains protein 1                          | LOC107056889 |
| 75 | intraflagellar transport protein 122 homolog                      | IFT122       |
| 76 | lysine-rich nucleolar protein 1                                   | KNOP1        |
| 77 | myocardin                                                         | MYOCD        |
| 78 | calcium/calmodulin-dependent protein kinase kinase 1              | CAMKK1       |
| 79 | putative Polycomb group protein ASXL1                             | ASXL1        |
| 80 | osteoclast stimulatory transmembrane protein                      | OCSTAMP      |
| 81 | immunoglobulin superfamily member 3                               | IGSF3        |
| 82 | ralBP1-associated Eps domain-containing protein 1                 | REPS1        |
| 83 | protein moonraker                                                 | /            |
| 84 | kinesin-like protein KIF12                                        | KIF12        |
| 85 | KIF17                                                             | KIF17        |
| 86 | sodium/hydrogen exchanger 8                                       | /            |

|     |                                                                |              |
|-----|----------------------------------------------------------------|--------------|
| 87  | phospholipid transfer protein                                  | PLTP         |
| 88  | solute carrier family 25 member 44                             | SLC25A44     |
| 89  | plexin-A2                                                      | PLXNA2       |
| 90  | rho GTPase-activating protein 23                               | ARHGAP23     |
| 91  | gamma-tubulin complex component 6                              | /            |
| 92  | zinc finger protein 646-like                                   | LOC101749845 |
| 93  | basic salivary proline-rich protein 2-like                     | LOC112530182 |
| 94  | integrin beta-8                                                | ITGB8        |
| 95  | thioredoxin, mitochondrial                                     | LOC107055648 |
| 96  | actin-binding LIM protein 1                                    | ABLIM1       |
| 97  | pericentrin                                                    | PCNT         |
| 98  | RNA helicase Mov10l1                                           | MOV10L1      |
| 99  | ATP-dependent RNA helicase DDX52                               | DDX52        |
| 100 | fumarylacetoacetate hydrolase domain-containing protein 2-like | LOC107049688 |
| 101 | meiosis-specific nuclear structural protein 1                  | MNS1         |
| 102 | telomere repeats-binding bouquet formation protein 1           | TERB1        |
| 103 | histone deacetylase 11                                         | HDAC11       |
| 104 | serine-protein kinase ATM                                      | ATM          |
| 105 | serine/threonine-protein kinase WNK2                           | WNK2         |
| 106 | neuronal pentraxin receptor                                    | NPTXR        |
| 107 | DENN domain-containing protein 2A                              | DENND2A      |
| 108 | ras GTPase-activating-like protein IQGAP1                      | IQGAP1       |
| 109 | NADH dehydrogenase [ubiquinone] 1 beta subcomplex subunit 10   | NDUFB10      |
| 110 | rabankyrin-5                                                   | ANKFY1       |
| 111 | carbonic anhydrase 4                                           | CA4          |
| 112 | 40S ribosomal protein S16                                      | RPS16        |
| 113 | vitamin K-dependent protein S                                  | LOC107055759 |
| 114 | zinc finger protein 501                                        | ZNF501       |
| 115 | growth hormone-regulated TBC protein                           | GRTP1        |
| 116 | RWD domain-containing protein 2B                               | RWDD2B       |
| 117 | transcription initiation factor TFIID subunit 4                | LOC415780    |
| 118 | radial spoke head protein 3 homolog                            | RSPH3        |
| 119 | inhibitor of Bruton tyrosine kinase                            | IBTK         |
| 120 | Shroom3                                                        | SHROOM3      |
| 121 | mitoferrin-2                                                   | LOC105195750 |
| 122 | SEC23-interacting protein                                      | SEC23IP      |
| 123 | UV excision repair protein RAD23 homolog B                     | RAD23B       |
| 124 | KIAA1257 homolog                                               | KIAA1257     |
| 125 | SYVN1                                                          | SYVN1        |
| 126 | LOC420107                                                      | LOC420107    |
| 127 | LOC423301                                                      | LOC423301    |

Supplementary Table S2 The GO annotation analyses of IBV S1-interacting host proteins

| Term                                                         | ID         | Input | Total | P-Value  | Corrected<br>P-Value |
|--------------------------------------------------------------|------------|-------|-------|----------|----------------------|
| adherens junction                                            | GO:0005912 | 6     | 80    | 8.85E-07 | 5.52E-04             |
| apical junction complex                                      | GO:0043296 | 3     | 15    | 4.04E-05 | 1.26E-02             |
| chromosome, telomeric region                                 | GO:0000781 | 3     | 26    | 1.75E-04 | 2.59E-02             |
| transcription coactivator activity                           | GO:0003713 | 5     | 140   | 2.22E-04 | 2.59E-02             |
| apical plasma membrane                                       | GO:0016324 | 5     | 144   | 2.52E-04 | 2.59E-02             |
| glomerular visceral epithelial cell<br>development           | GO:0072015 | 2     | 5     | 2.90E-04 | 2.59E-02             |
| regulation of myoblast differetiation                        | GO:0045661 | 2     | 5     | 2.90E-04 | 2.59E-02             |
| peroxisome proliferator activated<br>receptor binding        | GO:0042975 | 2     | 6     | 3.86E-04 | 2.80E-02             |
| thymus development                                           | GO:0048538 | 3     | 38    | 4.95E-04 | 2.80E-02             |
| chloride channel inhibitor activitiy                         | GO:0019869 | 2     | 7     | 4.96E-04 | 2.80E-02             |
| flotillin complex                                            | GO:0016600 | 2     | 7     | 4.96E-04 | 2.80E-02             |
| smooth muscle cell differentiation                           | GO:0051145 | 2     | 8     | 6.18E-04 | 2.80E-02             |
| oocyte development                                           | GO:0048599 | 2     | 8     | 6.18E-04 | 2.80E-02             |
| vasculogenesis                                               | GO:0001570 | 3     | 44    | 7.41E-04 | 2.80E-02             |
| ATP binding                                                  | GO:0005524 | 12    | 1073  | 7.48E-04 | 2.80E-02             |
| lens morphogenesis in camera-type<br>eye                     | GO:0002089 | 2     | 9     | 7.53E-04 | 2.80E-02             |
| positive regulation of transcription<br>by RNA polymerase II | GO:0045944 | 10    | 779   | 7.63E-04 | 2.80E-02             |
| chromatin binding                                            | GO:0003682 | 6     | 300   | 1.06E-03 | 3.66E-02             |

Supplementary Table S3 The KEGG enrichment analyses of IBV S1-interacting host proteins

| Term                                        | Input | Total | P-Value  | Corrected P-Value |
|---------------------------------------------|-------|-------|----------|-------------------|
| ECM-receptor interaction                    | 2     | 83    | 4.09E-02 | 4.38E-01          |
| Focal adhesion                              | 3     | 189   | 3.60E-02 | 4.38E-01          |
| Regulation of actin cytoskeleton            | 2     | 190   | 1.63E-01 | 4.81E-01          |
| Nucleotide excision repair                  | 1     | 38    | 1.37E-01 | 4.73E-01          |
| Protein processing in endoplasmic reticulum | 2     | 153   | 1.16E-01 | 4.73E-01          |
| Ubiquitin mediated proteolysis              | 1     | 127   | 3.84E-01 | 4.93E-01          |
| Adhesion junction                           | 2     | 70    | 3.02E-02 | 4.38E-01          |
| Melanogenesis                               | 1     | 91    | 2.94E-01 | 4.93E-01          |
| Wnt signaling pathway                       | 1     | 141   | 4.15E-01 | 4.93E-01          |
| ABC transporters                            | 1     | 40    | 1.43E-01 | 4.73E-01          |
| Tight junction                              | 1     | 156   | 4.48E-01 | 4.93E-01          |
| Homologous recombination                    | 1     | 38    | 1.37E-01 | 4.73E-01          |
| p53 signaling pathway                       | 1     | 66    | 2.23E-01 | 4.93E-01          |
| Cell cycle                                  | 1     | 114   | 3.52E-01 | 4.93E-01          |
| FoxO signaling pathway                      | 1     | 123   | 3.74E-01 | 4.93E-01          |
| Apoptosis                                   | 1     | 127   | 3.84E-01 | 4.93E-01          |
| Oxidative phosphorylation                   | 2     | 113   | 6.99E-02 | 4.38E-01          |
| Phagosome                                   | 1     | 132   | 3.95E-01 | 4.93E-01          |
| mTOR signaling pathway                      | 1     | 140   | 4.13E-01 | 4.93E-01          |
| Metabolic pathway                           | 3     | 1290  | 8.71E-01 | 8.71E-01          |
| C-type lectin receptor signaling pathway    | 1     | 87    | 2.83E-01 | 4.93E-01          |
| MAPK signaling pathway                      | 1     | 261   | 6.30E-01 | 6.70E-01          |
| Nitrogen metabolism                         | 1     | 17    | 6.56E-02 | 4.38E-01          |
| Fanconi anemia pathway                      | 1     | 50    | 1.63E-01 | 4.81E-01          |
| Cell adhesion molecules (CAMs)              | 2     | 122   | 7.95E-02 | 4.38E-01          |
| PPAR signaling pathway                      | 1     | 64    | 2.18E-01 | 4.93E-01          |
| mRNA surveillance pathway                   | 1     | 70    | 2.35E-01 | 4.93E-01          |
